# Supplementary material for: Acute depletion of METTL3 implicates N 6 -methyladenosine in alternative intron/exon inclusion in the nascent transcriptome
Source: HighWire-hosted journal article supplement (doi:10.1101/gr.271635.120), 2021-06-15
Supplement: Supplemental_Data_S2.zip [file METTL3_dTAG3h_4sU.xlsx]

## Sheet: C3
	baseMean	log2FoldChange	lfcSE	stat	pvalue	padj
A930011O12Rik	304.309	1.14432	0.17872	6.40288	1.52477e-10	9.42105e-07
BC030499	67.8915	1.78998	0.28675	6.2423	4.31183e-10	1.59848e-06
Btbd7	1622.03	-0.64871	0.154776	-4.19127	2.77398e-05	0.0214244
C030039L03Rik	317.973	-0.937254	0.205609	-4.55842	5.15392e-06	0.0056196
Chml	712.113	-0.712238	0.16908	-4.21244	2.52629e-05	0.0212852
Cntf	88.8865	1.68045	0.258082	6.5113	7.45037e-11	6.90501e-07
Col20a1	42.7092	2.29883	0.365644	6.28707	3.2351e-10	1.49915e-06
Gpr83	136.103	0.976661	0.234398	4.16668	3.09073e-05	0.0229159
Gzmm	125.243	-1.13437	0.245396	-4.62259	3.78971e-06	0.00468307
H1f0	607.715	-0.816884	0.206249	-3.96066	7.47416e-05	0.0477728
Il4i1	39.9129	1.41346	0.353652	3.99676	6.42145e-05	0.0440845
Imp3	764.762	-0.832425	0.193933	-4.29233	1.76804e-05	0.0163561
Knop1	5001.15	-0.656213	0.143514	-4.57247	4.82007e-06	0.00558405
Krt17	230.615	0.959753	0.196018	4.89625	9.76831e-07	0.00139281
Lpar6	166.388	-1.15237	0.236334	-4.87603	1.08241e-06	0.00143311
Mars2	758.696	-0.984818	0.199109	-4.94613	7.57048e-07	0.00116939
Mecom	29.1441	2.1933	0.421618	5.2021	1.9705e-07	0.000405836
Slc31a2	153.984	-0.928234	0.214202	-4.33345	1.46789e-05	0.0143205
Slc33a1	422.542	-0.897991	0.163458	-5.49372	3.93562e-08	9.11882e-05
Slc5a3	339.532	-1.16909	0.211559	-5.52607	3.27489e-08	8.6719e-05
Snn	241.509	-0.751609	0.184238	-4.07956	4.51217e-05	0.0321683
Terf2	1110.94	0.583287	0.13916	4.19149	2.77125e-05	0.0214244
Tmem81	88.1841	-1.27596	0.255304	-4.99779	5.79925e-07	0.0010412
Tor1aip2	4445.37	0.711664	0.142746	4.98554	6.17889e-07	0.0010412
Tubb3	1104.23	0.660058	0.165833	3.98025	6.88418e-05	0.0455733
Wdr20	615.865	-0.848357	0.149342	-5.68063	1.342e-08	4.14588e-05
Ythdc1	3341.76	0.626299	0.146267	4.2819	1.85303e-05	0.0163561
Zfp251	264.577	-1.36053	0.180006	-7.55823	4.08588e-14	7.57359e-10
RNERVK23-int:ERVK:LTR	488.584	-0.82775	0.1832	-4.51828	6.2345e-06	0.00642015

## Sheet: H5
	baseMean	log2FoldChange	lfcSE	stat	pvalue	padj
1700066M21Rik	326.348	-0.901002	0.223384	-4.03342	5.49702e-05	0.0205256
A930011O12Rik	548.669	1.13601	0.15605	7.27977	3.34401e-13	6.19946e-09
Adam1a	100.926	-1.11288	0.238368	-4.66875	3.03042e-06	0.00200646
Adhfe1	74.0876	1.40647	0.28947	4.85879	1.18107e-06	0.00109479
Amigo3	86.106	1.14508	0.298835	3.83183	0.000127196	0.0386572
B230219D22Rik	1782.27	-0.571334	0.149269	-3.82754	0.000129431	0.0387019
BC030499	66.4538	1.5614	0.284821	5.48205	4.20421e-08	9.74272e-05
Btbd7	1619.31	-0.70759	0.151311	-4.67639	2.91968e-06	0.00200474
C030039L03Rik	289.064	-1.02382	0.236998	-4.31997	1.56052e-05	0.0072326
C1galt1c1	392.701	-0.752569	0.184965	-4.06872	4.72724e-05	0.018258
Cbr3	386.095	0.883152	0.20175	4.37746	1.20073e-05	0.00585798
Chml	654.03	-0.928628	0.200329	-4.63551	3.56067e-06	0.00220038
Cntf	77.9332	1.46258	0.259499	5.63616	1.73885e-08	5.37276e-05
Col20a1	38.7845	2.27968	0.388226	5.87205	4.30437e-09	1.59597e-05
D10Wsu102e	2011.59	-0.544619	0.139062	-3.91638	8.98885e-05	0.030299
Epha4	3692.11	-0.644186	0.154759	-4.16252	3.14757e-05	0.0129673
Epha7	120.592	-0.978738	0.252759	-3.87221	0.000107852	0.0350784
Gadd45b	202.012	0.754602	0.200966	3.75488	0.000173423	0.0479864
Glce	1484.98	-0.705537	0.156004	-4.52256	6.10959e-06	0.00348448
Gm14403	2793.78	-0.742366	0.190196	-3.90316	9.49437e-05	0.0314314
Gpr83	323.362	0.963275	0.213144	4.51937	6.20248e-06	0.00348448
Il4i1	40.6214	1.85793	0.360568	5.15277	2.56663e-07	0.000366022
Imp3	669.007	-0.902272	0.210056	-4.29539	1.74384e-05	0.0076974
Inip	1228.12	-0.711238	0.148257	-4.79732	1.60801e-06	0.00141957
Jrk	1634.54	-0.673231	0.177758	-3.78734	0.000152268	0.0441077
Kif5a	178.885	0.831632	0.194556	4.27452	1.91552e-05	0.00825857
Knop1	5280.59	-0.754316	0.148753	-5.07095	3.95845e-07	0.000524183
Krt17	342.456	1.10681	0.204807	5.40416	6.51144e-08	0.000120716
Lpar6	195.851	-1.39057	0.212875	-6.53234	6.47508e-11	4.00138e-07
Mars2	766.783	-0.991731	0.199753	-4.96477	6.87809e-07	0.000750076
Mblac2	41.7742	-1.31514	0.344841	-3.81377	0.000136864	0.0402748
Mecom	28.5151	1.7237	0.446072	3.86417	0.000111467	0.0355261
Miat	199.943	1.01105	0.223097	4.5319	5.84564e-06	0.00348448
Mterf1a	394.01	-0.854526	0.206048	-4.14722	3.36542e-05	0.0135634
Mterf1b	192.008	-0.970637	0.217397	-4.46481	8.01392e-06	0.00423258
Ngfr	519.992	0.707981	0.1641	4.31433	1.60086e-05	0.0072386
Ovol1	96.746	0.944389	0.250241	3.77392	0.000160704	0.0451407
Plcd3	195.215	0.773389	0.195251	3.96099	7.46403e-05	0.0256251
Pmaip1	2480.21	-0.733888	0.191348	-3.83536	0.000125381	0.0386572
Rarg	760.743	0.716892	0.178016	4.02712	5.64651e-05	0.0205256
Rasgrp2	434.338	0.806102	0.17116	4.70963	2.48165e-06	0.00191697
Sfn	806.162	0.910391	0.171694	5.30239	1.14296e-07	0.000192631
Sfrp5	67.0895	1.51955	0.275683	5.51193	3.54919e-08	9.39976e-05
Six1	234.266	0.839258	0.188499	4.45232	8.49466e-06	0.00425628
Slc30a1	1837.5	0.600041	0.158628	3.7827	0.000155137	0.0442475
Slc33a1	430.489	-0.832377	0.17531	-4.74802	2.05417e-06	0.00165575
Slc5a3	279.029	-1.169	0.223641	-5.22713	1.72161e-07	0.000265974
Snai1	59.9104	1.28926	0.303723	4.24486	2.18727e-05	0.00921585
Spata2l	33.3574	1.49961	0.374285	4.0066	6.15982e-05	0.0215466
Tmem81	86.9684	-1.28033	0.257355	-4.97494	6.52691e-07	0.000750076
Tor1aip2	4532.49	0.643762	0.137247	4.69054	2.72489e-06	0.00194295
Tubb3	1066.37	0.701771	0.157369	4.4594	8.21905e-06	0.00423258
Wdr20	643.998	-1.12541	0.17774	-6.33176	2.42385e-10	1.1234e-06
Xkrx	33.6219	1.7289	0.423394	4.08344	4.4374e-05	0.0175032
Ythdc1	4983.54	0.69577	0.149914	4.64113	3.46502e-06	0.00220038
Zbtb26	749.348	-0.764944	0.18984	-4.02942	5.59139e-05	0.0205256
Zbtb7b	372.16	0.961208	0.196336	4.89573	9.7943e-07	0.00100876
Zc3h12a	347.582	0.885528	0.220578	4.01458	5.95509e-05	0.021231
Zfp251	220.881	-1.31296	0.191825	-6.84459	7.66973e-12	7.10946e-08
Zfp260	966.149	-0.779235	0.166119	-4.69082	2.72108e-06	0.00194295
Zfp296	925.631	0.936799	0.172734	5.42336	5.84882e-08	0.000120479
Zfp329	619.138	-0.642796	0.166497	-3.8607	0.000113061	0.0355261
Zfp607	371.528	-0.74862	0.172057	-4.35101	1.35512e-05	0.00644166
Zfp760	476.773	-0.903347	0.185247	-4.87646	1.08008e-06	0.00105387
Zfp780b	438.496	-0.705104	0.157703	-4.4711	7.78176e-06	0.00423258
Znf41-ps	735.364	-0.841706	0.177037	-4.7544	1.99039e-06	0.00165575
RNERVK23-int:ERVK:LTR	468.422	-0.839096	0.167504	-5.0094	5.46003e-07	0.000674824

## Sheet: DEG
	m6A	diff
A930011O12Rik	N	up
BC030499	N	up
Btbd7	Y	down
C030039L03Rik	Y	down
Chml	Y	down
Cntf	N	up
Col20a1	N	up
Gpr83	N	up
Il4i1	Y	up
Imp3	Y	down
Knop1	Y	down
Krt17	N	up
Lpar6	Y	down
Mars2	Y	down
Mecom	N	up
Slc33a1	Y	down
Slc5a3	Y	down
Tmem81	Y	down
Tor1aip2	Y	up
Tubb3	N	up
Wdr20	Y	down
Ythdc1	Y	up
Zfp251	Y	down
RNERVK23-int:ERVK:LTR
