# Supplementary figures and images for: Acute depletion of METTL3 implicates N 6 -methyladenosine in alternative intron/exon inclusion in the nascent transcriptome
Source: HighWire-hosted journal article supplement (doi:10.1101/gr.271635.120), 2021-06-15

**Histogram of data\$V1**

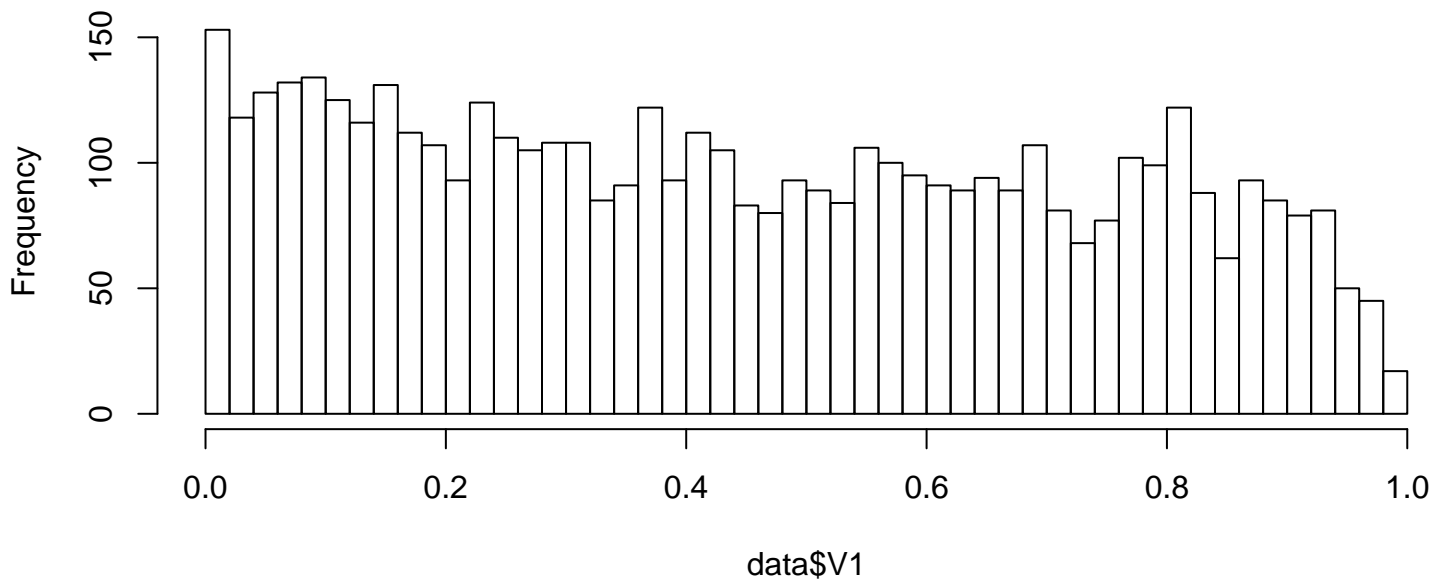

Supplement: Supplemental_Code.tar.gz.zip [file Intron2TSS.pdf › Nascent_m6A_Scripts/intron_methylation/Intron2TSS.pdf]
